# Supplementary material for: Gall-ID: tools for genotyping gall-causing phytopathogenic bacteria
Source: PeerJ journal article supplement (doi:10.7717/peerj.2222), 2016-07-19
Supplement: Figure_S3_legend.pdf [file Figure_S3_legend.pdf]

### SUPPLEMENTAL FIGURE 3

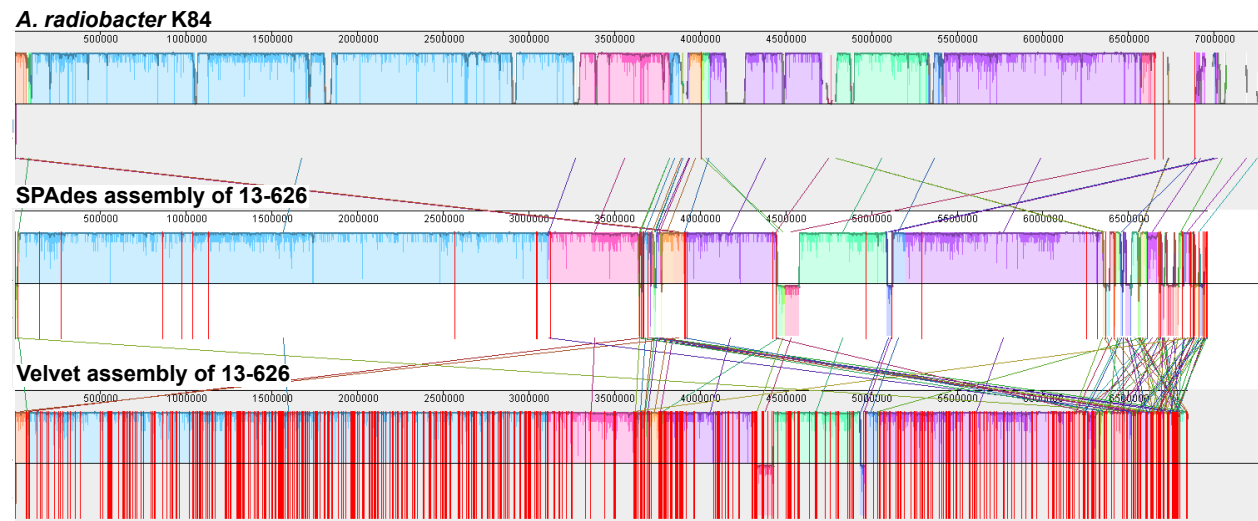

**Supplemental Figure 3. Whole genome alignment of 13-626 assemblies to a close reference sequence indicates collinearity of genomes.** The *A. radiobacter* K84 genome sequence (top) and assemblies of 13-626 generated using SPAdes v. 3.7.0 (middle; 47 scaffolds) and Velvet (bottom; 527 scaffolds) were aligned using Mauve. Shared locally collinear blocks (LCBs) between the reference and the two assemblies are color-coded and connected by color-coded lines. Scaffold and replicon ends are depicted as vertical red lines.
