# Supplementary material for: Gall-ID: tools for genotyping gall-causing phytopathogenic bacteria
Source: PubMed Central journal article supplement (PMC4958008; doi:10.7717/peerj.2222), 2016-07-19
Supplement: peerj-04-2222-s001.pdf [file peerj-04-2222-s001.pdf]

**Supplementary Table 1. Comparison of Velvet to SPAdes assemblies of 14 isolates associated with crown gall.**

| Isolate name | Velvet Assembly      |          |                      | SPAdes Assembly      |          |                      |
|--------------|----------------------|----------|----------------------|----------------------|----------|----------------------|
|              | # of scaffolds > 1kb | N50 (bp) | Assembly length (bp) | # of scaffolds > 1kb | N50 (bp) | Assembly length (bp) |
| 13-2099-1-2  | 52                   | 275,131  | 5,552,211            | 36                   | 305,993  | 5,655,819            |
| 13-626       | 579                  | 21,870   | 6,842,659            | 47                   | 520,764  | 6,958,258            |
| AC27/96      | 154                  | 96,285   | 7,277,651            | 62                   | 304,507  | 7,294,256            |
| AC44/96      | 47                   | 329,597  | 6,092,333            | 42                   | 411,299  | 6,103,740            |
| B131/95      | 113                  | 172,630  | 7,277,855            | 56                   | 477,595  | 7,297,525            |
| B133/95      | 78                   | 301,459  | 7,163,747            | 57                   | 478,752  | 7,169,549            |
| B140/95      | 153                  | 65,958   | 5,712,082            | 39                   | 261,962  | 5,717,522            |
| N2/73        | 52                   | 299,053  | 5,744,801            | 28                   | 583,418  | 5,768,133            |
| W2/73        | 53                   | 247,839  | 5,490,237            | 25                   | 437,031  | 5,510,033            |
| 15-1187-1-2a | 87                   | 146,955  | 5,982,904            | 30                   | 349,571  | 6,003,102            |
| 15-1187-1-2b | 141                  | 89,835   | 5,979,368            | 33                   | 349,600  | 6,003,936            |
| 14-2641      | 168                  | 101,816  | 6,253,349            | NA                   | NA       | NA                   |
| 15-172       | 106                  | 108,118  | 5,420,030            | 48                   | 324,414  | 5,448,190            |
| 15-174       | 59                   | 247,284  | 6,032,397            | 30                   | 609,451  | 6,054,965            |
