# Supplementary material for: Gall-ID: tools for genotyping gall-causing phytopathogenic bacteria
Source: PubMed Central journal article supplement (PMC4958008; doi:10.7717/peerj.2222), 2016-07-19
Supplement: peerj-04-2222-s003.pdf [file peerj-04-2222-s003.pdf]

**SUPPLEMENTAL FIGURE 2**

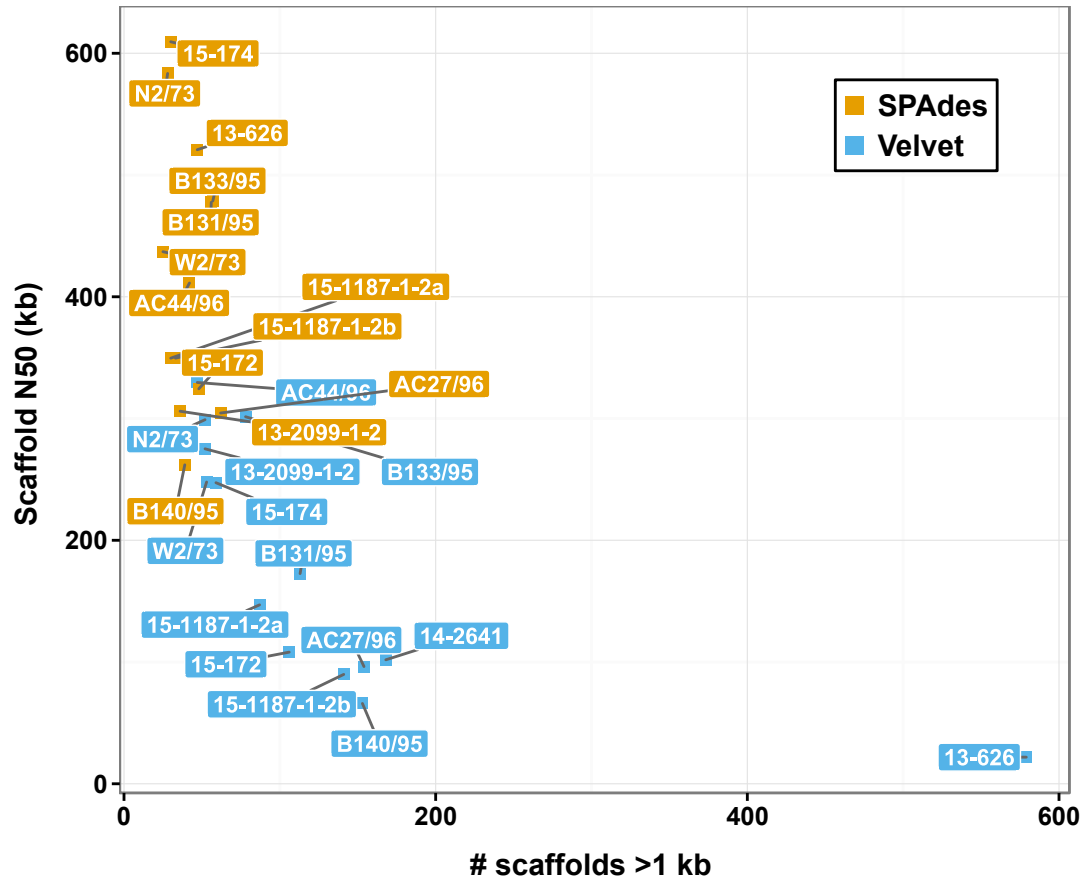

**Supplemental Figure 2. The SPAdes assembler produces high quality assemblies.** Genome sequences assembled using Velvet v. 1.2.10 (blue) and SPAdes v. 3.7.0 (orange) were compared based on scaffold N50 and number of scaffolds greater than 1kb in size.
